# Supplementary material for: Boosting HSA Vaccination with Jujube Powder Modulating Gut Microbiota Favorable for Arginine Metabolism
Source: MDPI journal article supplement (doi:10.3390/nu15081955), 2023-04-19
Supplement: s1 [file s1]

## Supporting Information

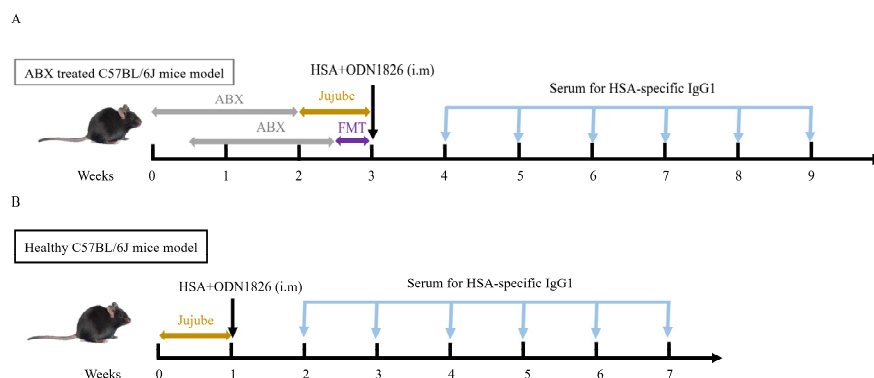

**Figure S1.** The scheme of experimental procedures. (A) In the antibiotic cocktail (ABX) treated mice model, firstly, mice were fed water containing ABX (1 g/L ampicillin, 1 g/L neomycin, 1 g/L metronidazole, and 0.5 g/L vancomycin) for 2 weeks. Then, mice in ABX+J+HSA group were daily oral administration of jujube powder (800 mg/kg) for a week. Mice in ABX+FMT+HSA group were daily fecal microbiota transferred (FMT) from the fecal of same strain and age mice for 3 days. After that, mice were intramuscular (i.m) injected with 90  $\mu$ g human serum albumin (HSA) and 5  $\mu$ g oligodeoxynucleotide 1826 (ODN1826) dissolved in 100  $\mu$ L saline solution. The mice in control (CTR) group were i.m injected with equal volume saline solution. Each of CTR, HSA, ABX+HSA, ABX+J+HSA and ABX+FMT+HSA group had 8 mice. (B) In the healthy mice model, mice in J group were daily pre-administration of jujube powder (800 mg/kg) for a week, and they were i.m injected with HSA (90  $\mu$ g) and ODN1826 (5  $\mu$ g) dissolved in 100  $\mu$ L saline solution. Each of CTR, J, HSA, and HSA+J group had 10 mice. Mice were collected 30  $\mu$ L peripheral blood with 1.5% isoflurane every week through retro-orbital sinus puncture into capillary tubes.

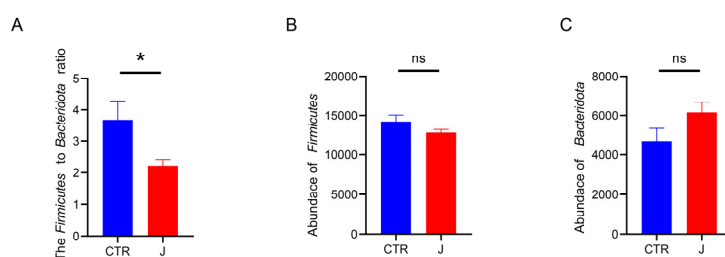

**Figure S2.** The abundance of *Firmicutes* and *Bacteroidota* in control and jujube group. (A) The ratio of *Firmicutes* and *Bacteroidota* in CTR and J group. (B) The abundance of *Firmicutes* CTR and J group. (C) The abundance of *Bacteroidota* CTR and J group. no significance (ns), \* p < 0.05.

**Table S1.** Relevant statistics depend on the statical approach

| Figure | Compared data                  | T test  |          | Anova   |
|--------|--------------------------------|---------|----------|---------|
|        |                                | T value | df value | F value |
| 1A     | ABX+HSA vs ABX (week3)         | 2.57    | 9.13     |         |
|        | ABX+HSA vs ABX (week6)         | 2.97    | 7.17     |         |
| 1B     | ABX+HSA+FMT vs ABX+HSA (week3) | 3.47    | 10       |         |
|        | ABX+HSA+FMT vs ABX+HSA (week6) | 2.5     | 11       |         |
| 1C     | ABX+HSA+J vs ABX+HSA (week4)   | 2.63    | 10.13    |         |
|        | ABX+HSA+J vs ABX+HSA (week5)   | 2.71    | 7.57     |         |
|        | ABX+HSA+J vs ABX+HSA (week6)   | 2.88    | 5.24     |         |
| 1D     | ABX+HSA vs the other groups    |         |          | 2.58    |
| 1E     | ABX+HSA vs the other groups    |         |          | 3.5     |
| 1F     | ABX+HSA vs the other groups    |         |          | 4.34    |
| 1G     | ABX+HSA vs the other groups    |         |          | 3.24    |
| 2A     | ABX+HSA vs the other groups    |         |          | 16.18   |
| 2B     | ABX+HSA vs the other groups    |         |          | 3.25    |
| 2C     | ABX+HSA vs the other groups    |         |          | 4.3     |
| 2D     | ABX+HSA vs the other groups    |         |          | 3.66    |
| 2E     | ABX+HSA vs the other groups    |         |          | 2.67    |
| 2F     | ABX+HSA vs the other groups    |         |          | 4.16    |
| 3A     | HSA+J vs HSA(week3)            | 3.35    | 11       |         |
|        | HSA+J vs HSA(week6)            | 2.59    | 9.57     |         |
| 3B     | HSA+J vs HSA                   | 3.02    | 17       |         |
| 3C     | HSA+J vs HSA                   | 0.32    | 14       |         |
| 3D     | HSA+J vs HSA                   | 4.12    | 14       |         |
| 3E     | HSA+J vs HSA                   | 4.01    | 17       |         |
| 3F     | HSA+J vs HSA                   | 1.41    | 14       |         |
| 3G     | HSA+J vs HSA                   | 2.84    | 12       |         |
